# Supplementary material for: Lithospheric and sub-lithospheric deformation under the Borborema Province of NE Brazil from receiver function harmonic stripping
Source: Copernicus journal article supplement (doi:10.5194/se-2019-41), 2019-03-04
Supplement: Supplementary file 1 [file se-2019-41-supplement.pdf]

Table S1 lists the seismic stations used in this study. We report station coordinates (latitude and longitude), elevation and recording time window. The last column indicates whether the station was selected for harmonic stripping or not (see details in section 3).

**Table S1.** List of stations with coordinates, elevation, recording time window, and selection

| Station                     | Latitude °N | Longitude °E | Elevation (m) | Recording time window   | Selection |
|-----------------------------|-------------|--------------|---------------|-------------------------|-----------|
| RSISNE (Broadband Stations) |             |              |               |                         |           |
| nban                        | -9.669      | -36.275      | 261           | 29/09/2011 - 25/11/2013 | yes       |
| nbca                        | -8.226      | -36.013      | 616           | 09/04/2012 - 22/04/2013 | no        |
| nbcl                        | -4.224      | -38.291      | 020           | 26/05/2011 - 28/12/2013 | yes       |
| nbcp                        | -12.589     | -39.181      | 222           | 27/09/2011 - 30/04/2013 | yes       |
| nbit                        | -14.931     | -39.434      | 178           | 13/10/2011 - 25/11/2013 | yes       |
| nbla                        | -10.993     | -37.789      | 217           | 03/09/2011 - 25/11/2013 | yes       |
| nbli                        | -7.364      | -36.950      | 613           | 18/07/2011 - 25/11/2013 | yes       |
| nbma                        | -7.365      | -38.764      | 437           | 06/07/2011 - 25/11/2013 | yes       |
| nbmo                        | -3.311      | -40.041      | 098           | 29/12/2010 - 28/12/2012 | yes       |
| nbpa                        | -5.750      | -37.112      | 091           | 12/04/2011 - 25/11/2013 | yes       |
| nbpb                        | -5.543      | -39.584      | 260           | 29/05/2011 - 28/12/2013 | yes       |
| nbpn                        | -10.847     | -40.199      | 387           | 05/04/2011 - 25/11/2013 | yes       |
| nbps                        | -4.394      | -41.446      | 719           | 24/09/2011 - 25/11/2013 | yes       |
| nbpv                        | -6.418      | -35.291      | 092           | 30/04/2011 - 25/11/2013 | yes       |
| nbrf                        | -8.679      | -35.127      | 061           | 02/08/2011 - 25/11/2013 | yes       |
| nbta                        | -9.122      | -38.063      | 344           | 27/07/2011 - 25/11/2013 | yes       |
| nbjg                        | -5.5932     | -38.3947     | 119           | 17/07/2013 - 25/11/2013 | no        |
| nbpe                        | -9.2465     | -40.6804     | 450           | 12/08/2013 - 16/11/2013 | no        |
| nbpi                        | -7.083      | -41.3699     | 247           | 12/08/2013 - 24/10/2013 | no        |
| INCT-ET                     |             |              |               |                         |           |
| Broadband Stations          |             |              |               |                         |           |
| lp01                        | -3.167      | -40.926      | 067           | 20/03/2012 - 06/02/2013 | no        |
| lp02                        | -4.513      | -39.635      | 688           | 20/03/2012 - 06/02/2013 | yes       |
| lp03                        | -5.0056     | -38.9935     | 234           | 2012.073 to 2013.030    | no        |
| lp04                        | -5.590      | -38.386      | 138           | 28/05/2012 - 05/02/2013 | no        |
| lp05                        | -6.678      | -37.546      | 248           | 04/02/2012 - 05/02/2013 | no        |
| lp06                        | -7.747      | -36.315      | 522           | 25/03/2012 - 28/02/2013 | yes       |
| lp07                        | -8.227      | -35.6401     | 531           | 25/03/2012 - 28/02/2013 | no        |
| Short-period Stations       |             |              |               |                         |           |
| km60                        | -5.219      | -37.876      | 141           | 03/10/2011 - 13/08/2012 | yes       |
| pcac                        | -6.475      | -36.62       | 293           | 28/09/2011 - 24/04/2013 | no        |

|                              |          |          |     |                         |     |
|------------------------------|----------|----------|-----|-------------------------|-----|
| pcal                         | -7.569   | -35.233  | 098 | 05/12/2011 - 23/04/2013 | yes |
| pcbs                         | -7.747   | -36.315  | 522 | 23/11/2011 - 19/03/2013 | no  |
| pccc                         | -6.026   | -36.342  | 614 | 15/08/2012 - 13/04/2013 | no  |
| pccg                         | -7.305   | -35.772  | 409 | 15/09/2011 - 24/04/2013 | no  |
| pcgr                         | -8.228   | -35.640  | 522 | 22/11/2011 - 19/03/2013 | no  |
| pcgu                         | -7.906   | -37.377  | 657 | 16/08/2012 - 16/05/2013 | no  |
| pcja                         | -6.463   | -35.958  | 310 | 04/10/2011 - 24/04/2013 | yes |
| pcjg                         | -5.593   | -38.395  | 134 | 03/11/2011 - 19/03/2013 | no  |
| pcma                         | -5.181   | -36.603  | 160 | 06/10/2011 - 07/06/2012 | no  |
| pcmn                         | -6.828   | -35.114  | 036 | 25/11/2011 - 19/03/2013 | no  |
| pcpi                         | -5.976   | -35.235  | 064 | 23/10/2011 - 14/08/2012 | no  |
| pcqp                         | -8.817   | -36.037  | 549 | 15/08/2012 - 16/05/2013 | no  |
| pcsa                         | -8.351   | -36.551  | 694 | 19/10/2011 - 24/04/2013 | yes |
| pcse                         | -8.326   | -37.473  | 482 | 07/12/2011 - 24/04/2013 | yes |
| pcsl                         | -7.008   | -36.381  | 596 | 06/12/2011 - 23/04/2013 | yes |
| pcso                         | -8.957   | -36.702  | 858 | 16/08/2012 - 16/05/2013 | no  |
| pcst                         | -8.199   | -38.431  | 419 | 17/08/2012 - 16/05/2013 | no  |
| pctu                         | -8.785   | -37.341  | 746 | 16/08/2012 - 16/05/2013 | no  |
| pctv                         | -7.646   | -37.860  | 746 | 07/12/2011 - 25/04/2013 | yes |
| pcvs                         | -6.679   | -37.546  | 210 | 29/09/2011 - 25/03/2012 | no  |
| Milênio (Broadband Stations) |          |          |     |                         |     |
| agbr                         | -8.4295  | -35.9361 | 489 | 05/04/2007 - 01/03/2008 | no  |
| ocbr                         | -4.5813  | -38.392  | 076 | 16/08/2007 - 04/07/2009 | yes |
| pfbr                         | -6.1216  | -38.271  | 120 | 26/08/2007 - 22/02/2013 | yes |
| sabr                         | -8.3511  | -36.550  | 681 | 17/04/2009 - 03/09/2011 | yes |
| sbbr                         | -3.7451  | -40.371  | 056 | 22/07/2007 - 07/06/2013 | yes |
| slbr                         | -6.7815  | -35.744  | 544 | 22/09/2007 - 16/10/2008 | no  |
| GSN (Broadband Station)      |          |          |     |                         |     |
| rcbr                         | -5.8274  | -35.901  | 420 | 20/08/2007 - 30/12/2013 | yes |
| BLSP (Broadband Stations)    |          |          |     |                         |     |
| agbl                         | -9.038   | -37.045  | 448 | 07/02/2002 - 30/11/2004 | no  |
| caub                         | -8.176   | -36.010  | 490 | 07/02/2002 - 30/11/2004 | yes |
| crtb                         | -13.4321 | -44.5819 | 541 | 22/12/2003 - 29/04/2004 | no  |
| cs6b                         | -5.4945  | -38.6709 | 110 | 19/05/2003 - 15/06/2005 | yes |

|                             |          |          |     |                         |     |
|-----------------------------|----------|----------|-----|-------------------------|-----|
| itpb                        | -15.9887 | -39.6282 | 307 | 12/10/2002 - 03/05/2004 | yes |
| pdcb                        | -12.5306 | -39.1238 | 220 | 24/09/2002 - 25/02/2004 | yes |
| trsb                        | -4.873   | -42.7059 | 125 | 12/10/2002 - 03/05/2004 | yes |
| Bodes (Broadband Stations)  |          |          |     |                         |     |
| ar01                        | -6.1682  | -39.4098 | 305 | 11/02/2015 - 22/02/2016 | yes |
| ar02                        | -6.6419  | -39.3402 | 341 | 02/02/2015 - 18/02/2017 | yes |
| ar03                        | -7.0466  | -39.4958 | 479 | 02/02/2015 - 07/06/2016 | no  |
| ar04                        | -7.5758  | -39.6746 | 493 | 07/01/2015 - 18/02/2017 | yes |
| ar05                        | -8.0932  | -39.8983 | 441 | 02/02/2015 - 18/02/2017 | yes |
| ar06                        | -8.6305  | -40.2249 | 454 | 02/02/2015 - 24/08/2016 | yes |
| ar07                        | -9.6154  | -40.3837 | 405 | 02/02/2015 - 25/12/2016 | yes |
| ar08                        | -9.1450  | -40.3727 | 394 | 13/02/2015 - 21/08/2016 | no  |
| ar09                        | -10.2136 | -40.1954 | 678 | 07/06/2016 - 24/04/2017 | yes |
| ar50                        | -7.2079  | -39.5494 | 920 | 19/09/2015 - 21/06/2016 | no  |
| ar51                        | -7.3879  | -39.6314 | 933 | 11/06/2015 - 11/06/2015 | no  |
| Others (Broadband Stations) |          |          |     |                         |     |
| jcbe                        | -5.446   | -35.775  | 114 | 28/10/2011 - 14/11/2012 | no  |
| pcsc                        | -8.35    | -36.191  | 582 | 27/08/2012 - 14/12/2012 | no  |

Figure S1 displays harmonic stripping results for each station. The five coefficient functions ( $A(z)$ ,  $B(z)$ ,  $C(z)$ ,  $D(z)$  and  $E(z)$ ) - obtained by solving equation 1 - are represented in the upper part of the figure. The lower part represents the energy functions for the  $k=1$  and  $k=2$  harmonic degrees (see section 3). Note that, for most stations, energy on the  $k=1$  and  $k=2$  harmonic degrees are of comparable strength.

Figure S2 displays the  $k=1$  and  $k=2$  energy functions (see section 3) obtained for a synthetic receiver function test. We present 4 velocity models consisting of 3 layers with constant  $V_p$  and  $V_s$ . Layer 2 (in the middle) is characterized by anisotropy with an horizontal (first case -  $0^\circ$ ) or dipping (following cases -  $10^\circ$ ,  $15^\circ$ ,  $20^\circ$ ) fast axis of symmetry. Note that, for a horizontal axis of symmetry, the energy is entirely on the  $k=2$  harmonic and that, when increasing the dip of the axis of symmetry, more energy becomes visible on the  $k=1$  degree. For a slightly dipping axis of symmetry ( $10^\circ$ -to- $15^\circ$ ), energy on both  $k=1$  and  $k=2$  degrees are of similar strength. And for a  $20^\circ$  dip, energy is dominant on the  $k=1$  harmonic.

**AR01**

harmonics

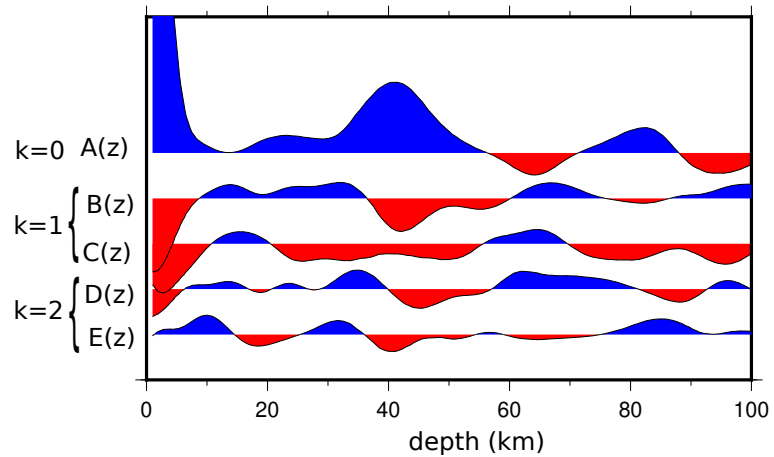

energy

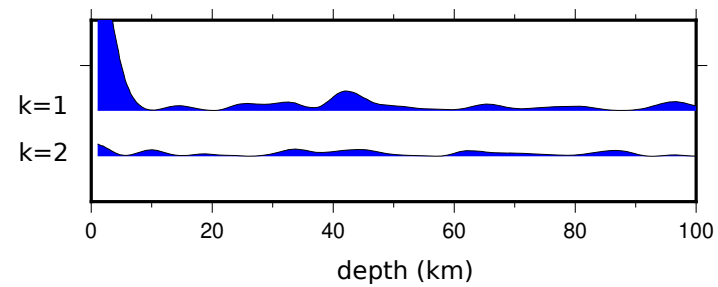**AR02**

harmonics

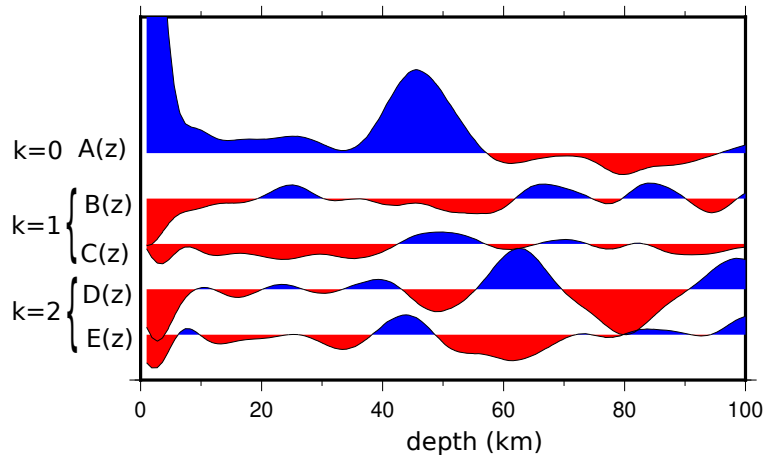

energy

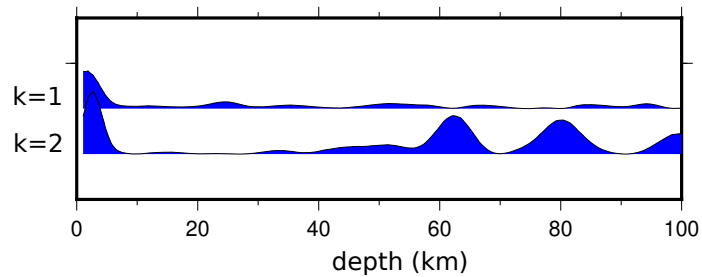**AR04**

harmonics

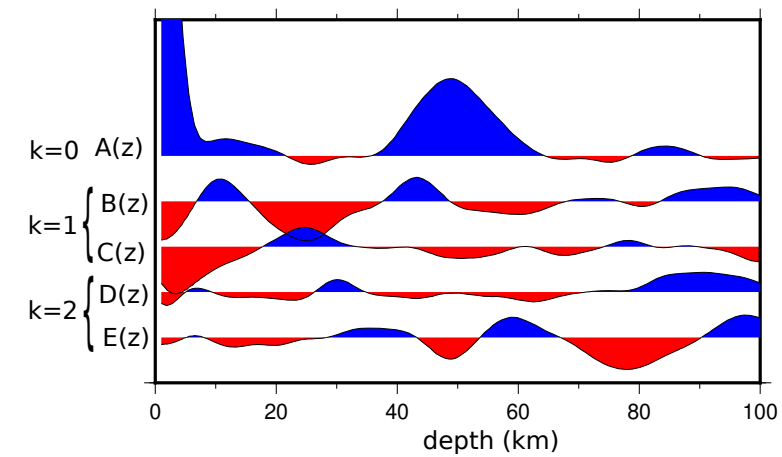

energy

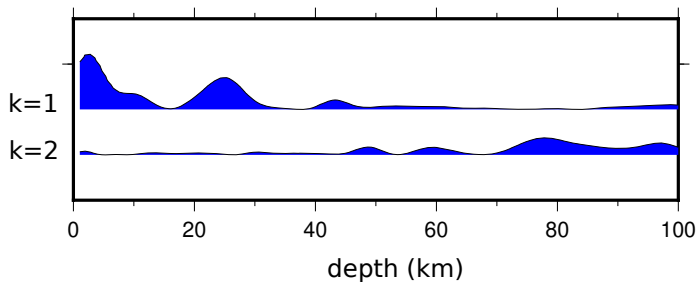**AR05**

harmonics

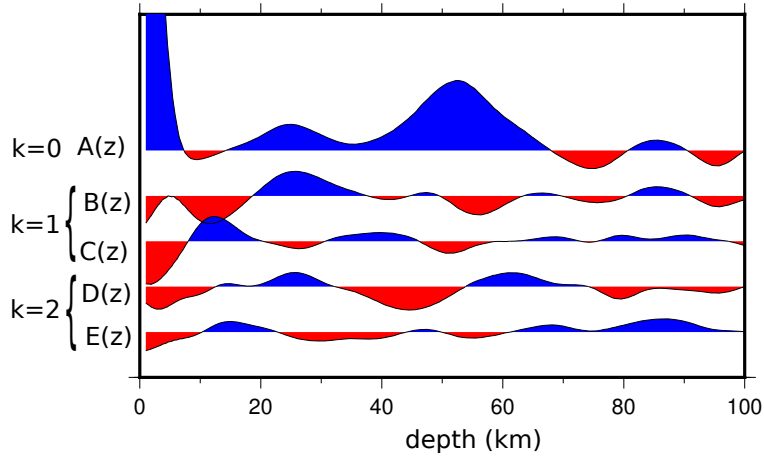

energy

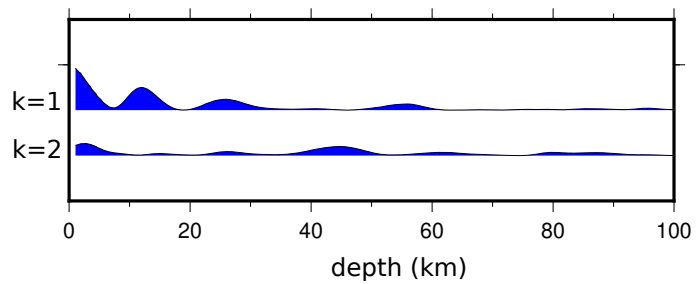

# AR06

## harmonics

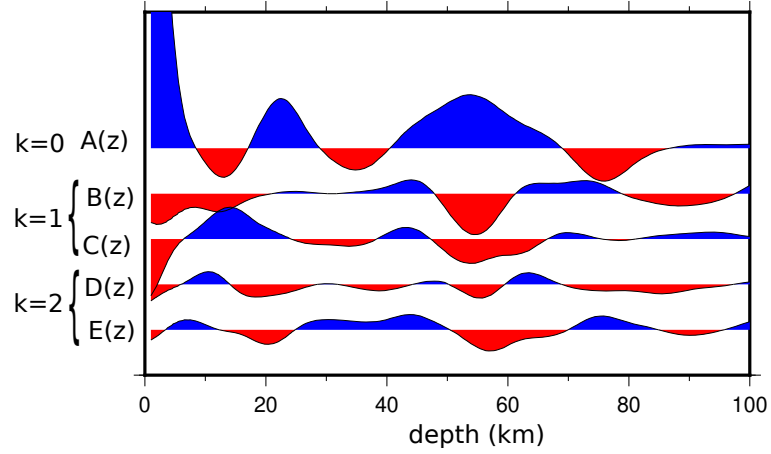

## energy

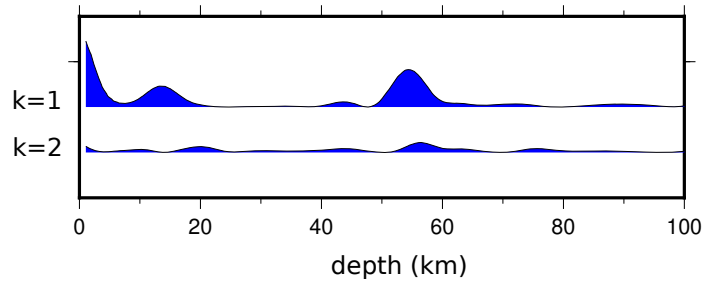

# AR07

## harmonics

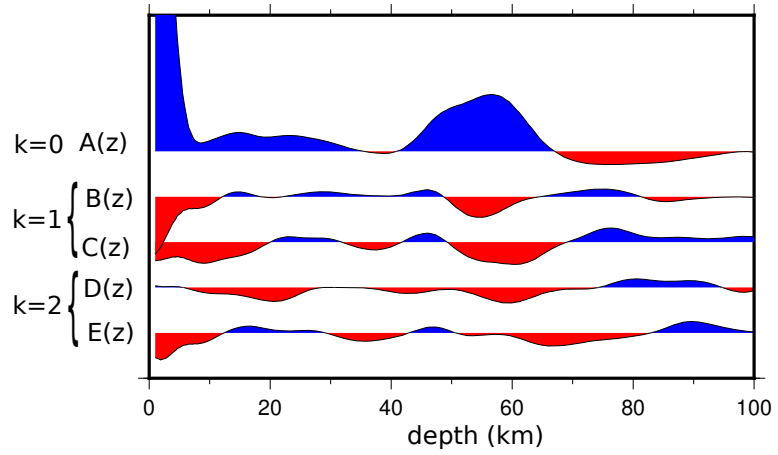

## energy

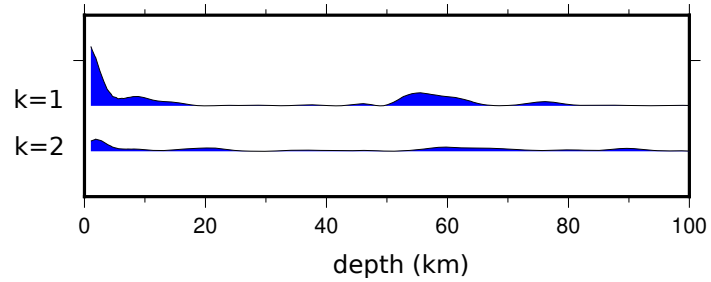

# AR09

## harmonics

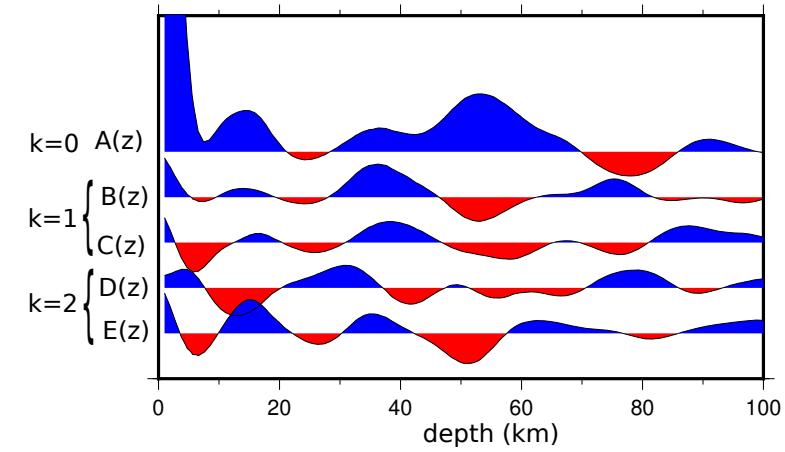

## energy

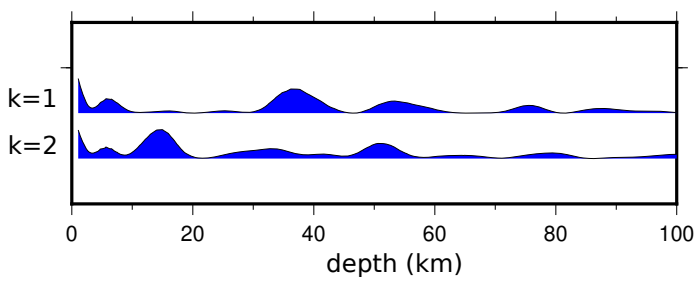

# CAUB

## harmonics

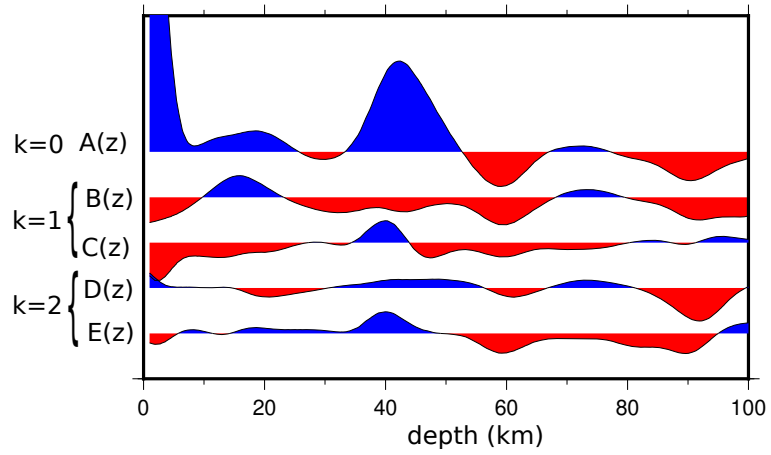

## energy

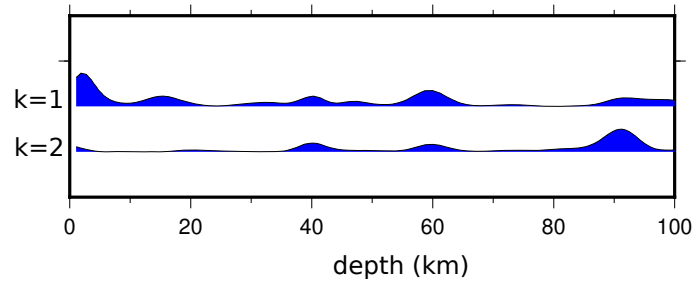

# CS6B

## harmonics

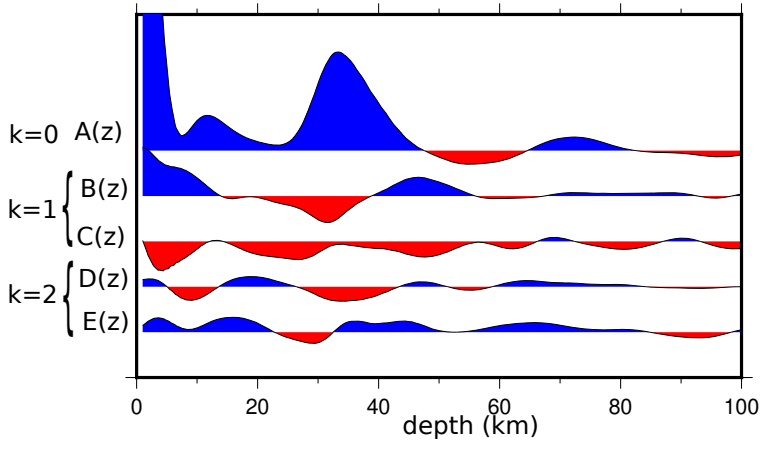

## energy

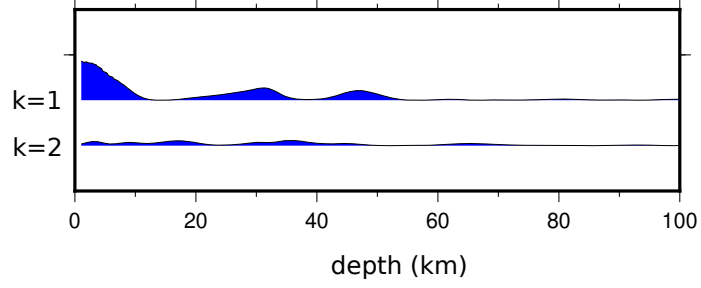

# ITPB

## harmonics

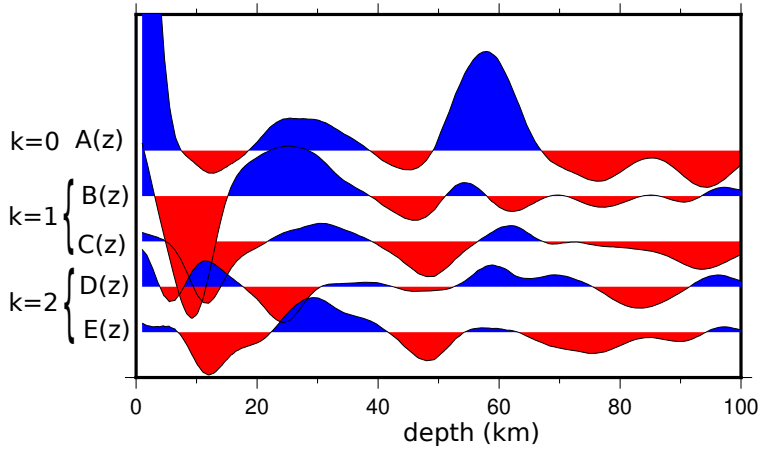

## energy

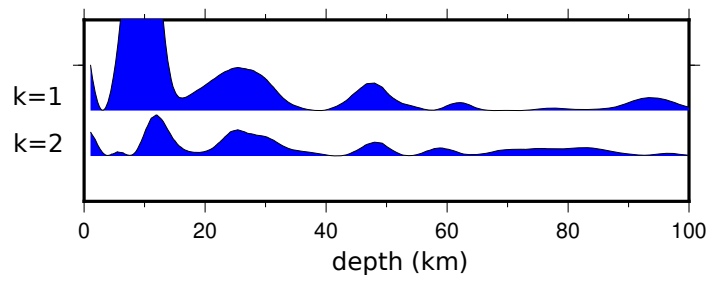

# KM60

## harmonics

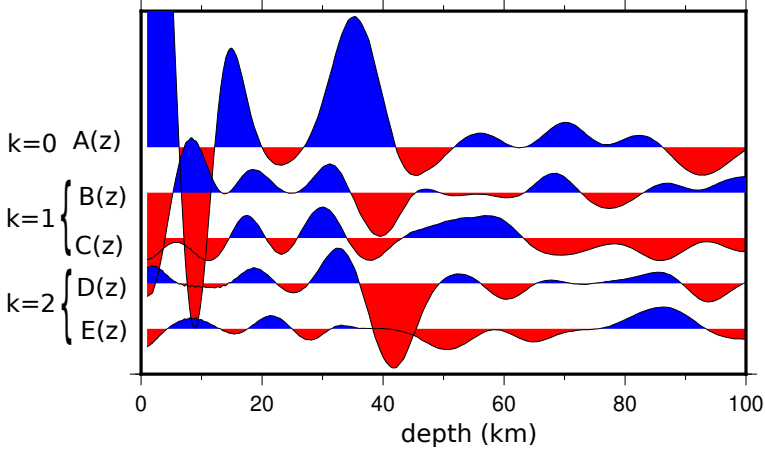

## energy

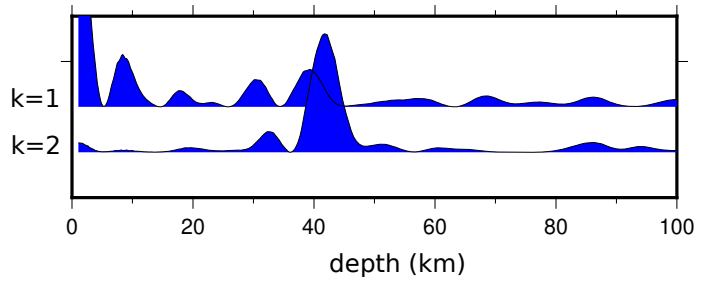

# LP02

## harmonics

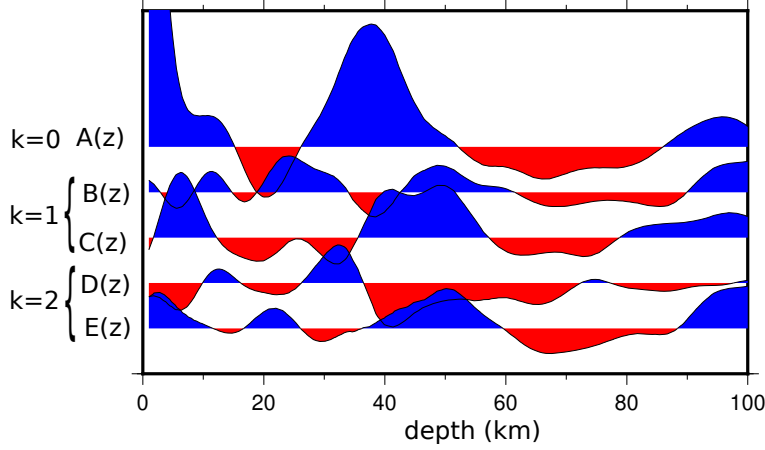

## energy

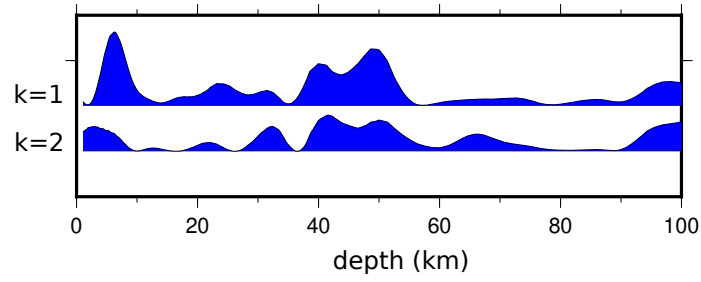

## LP06

harmonics

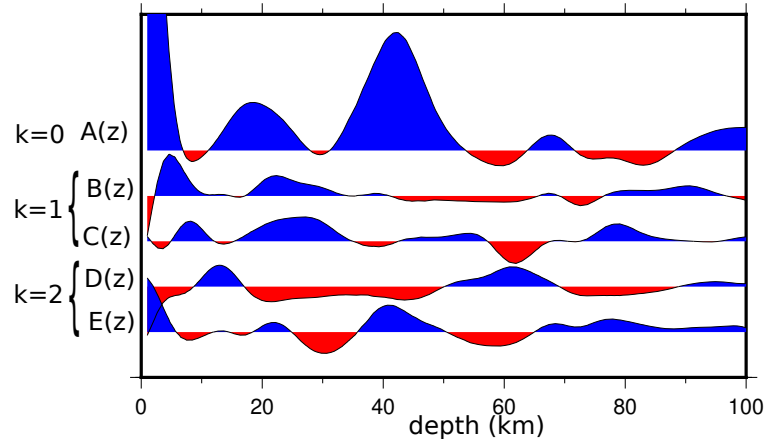

energy

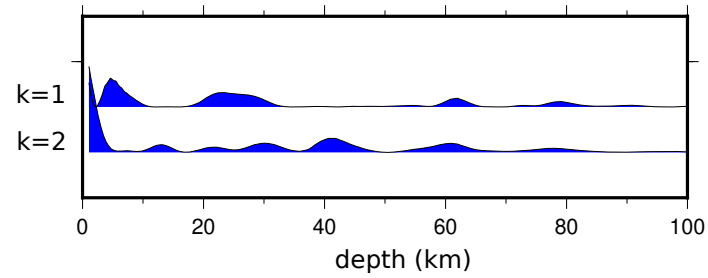

## NBCL

harmonics

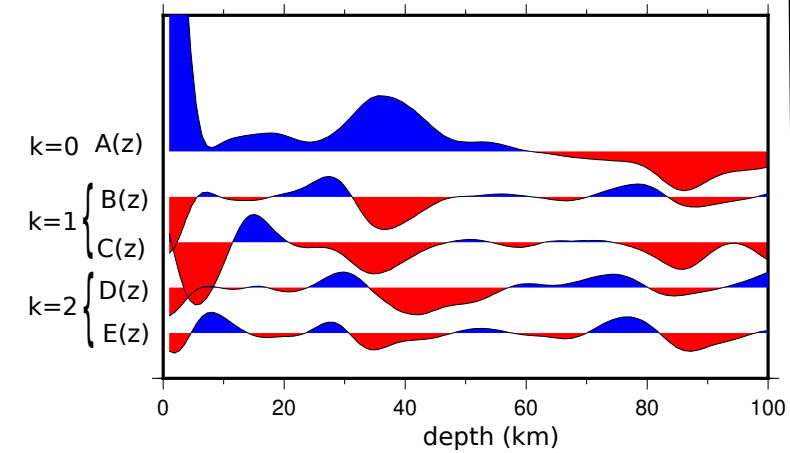

energy

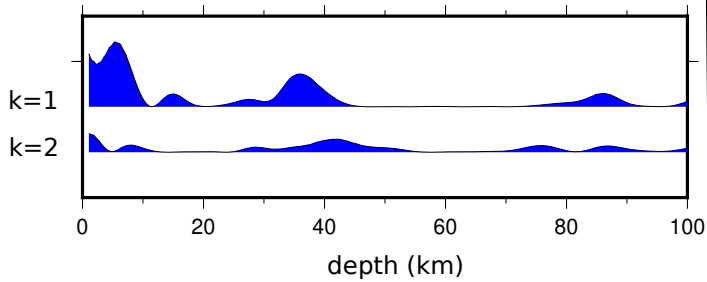

## NBAN

harmonics

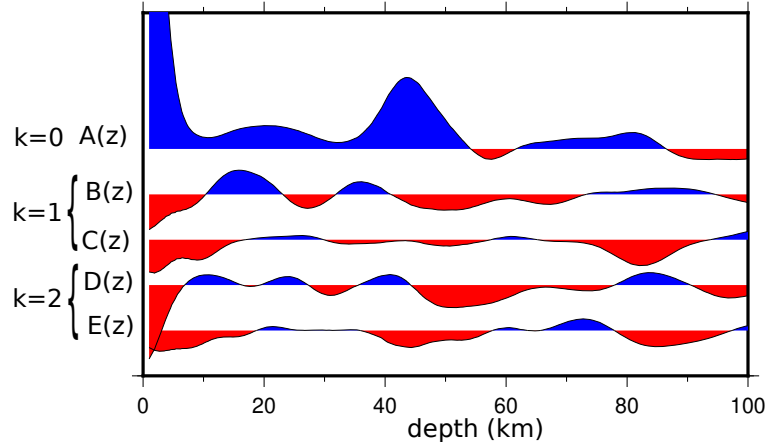

energy

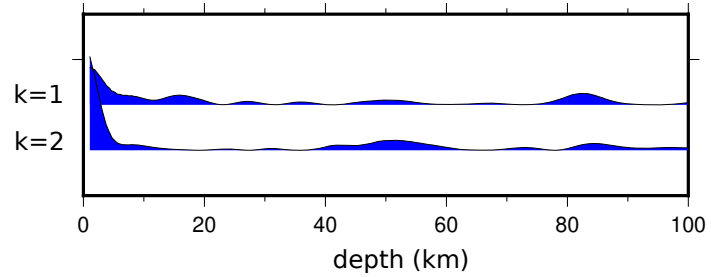

## NBCP

harmonics

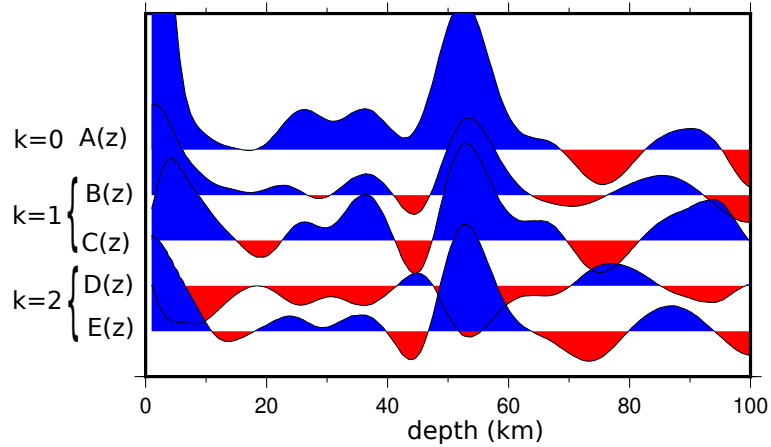

energy

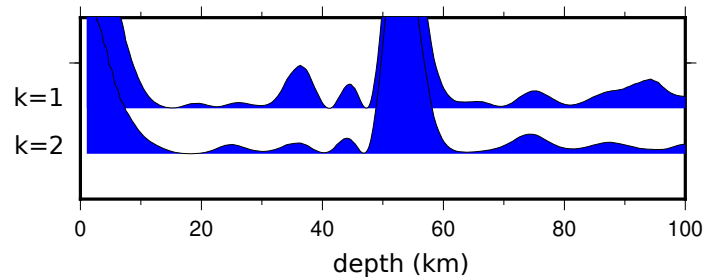



**NBIT**

harmonics

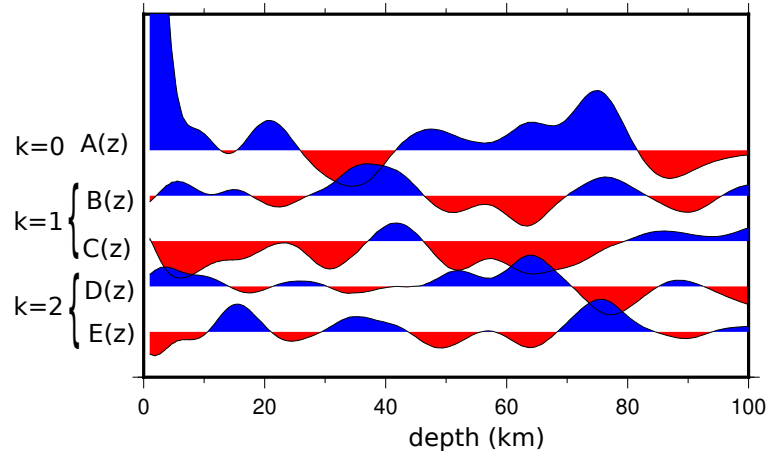

energy

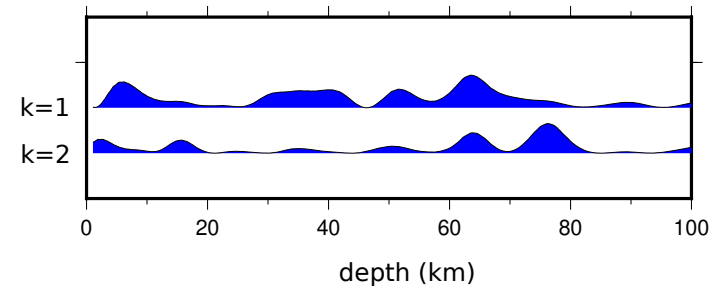**NBLA**

harmonics

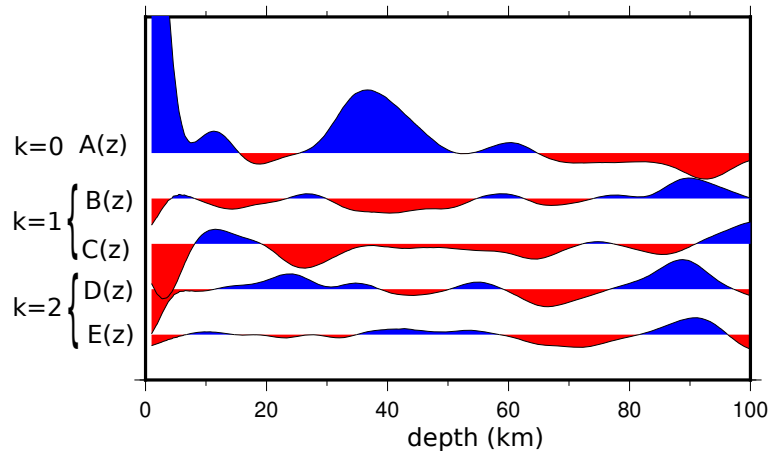

energy

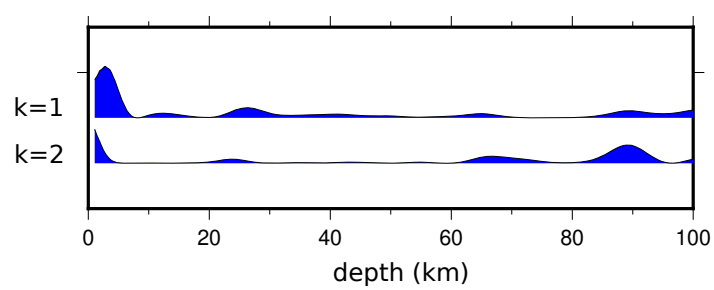**NBLI**

harmonics

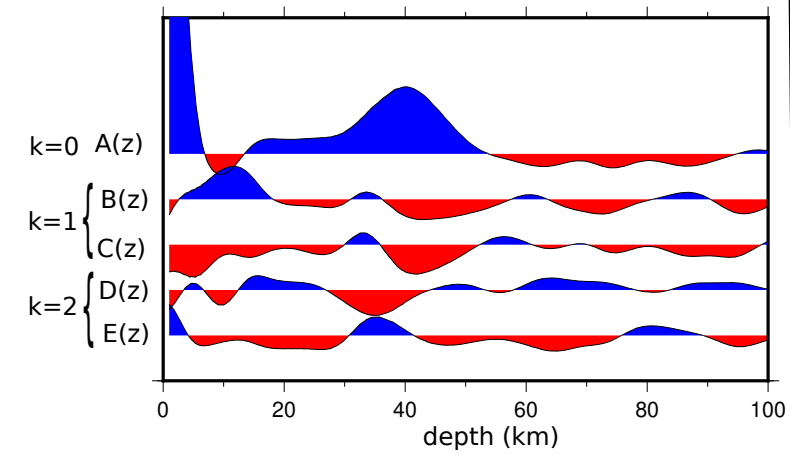

energy

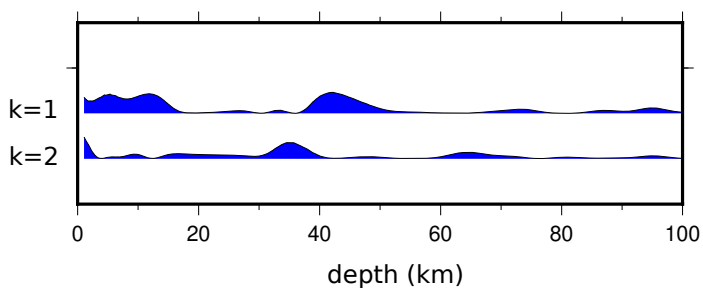**NBMA**

harmonics

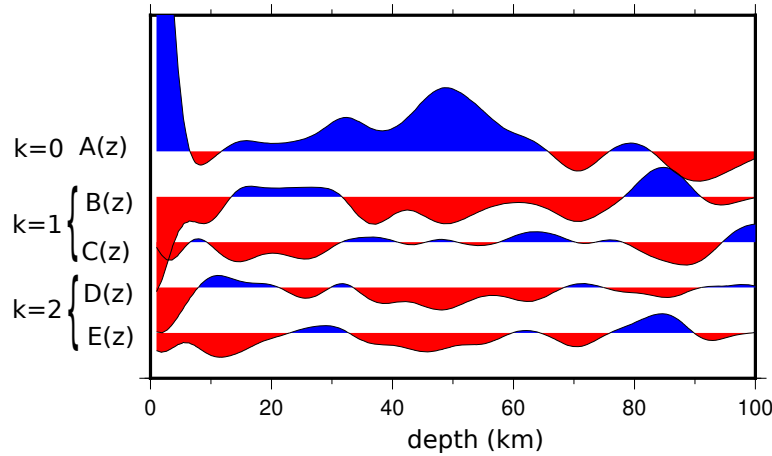

energy

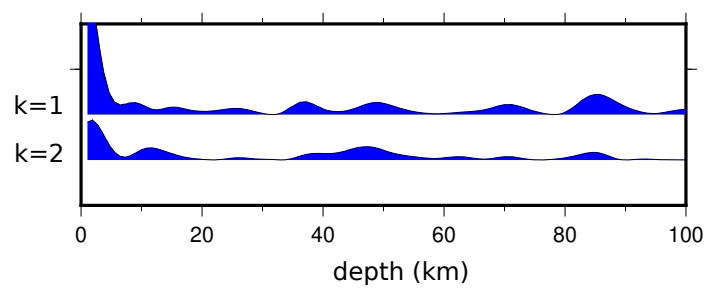

# NBMO

harmonics

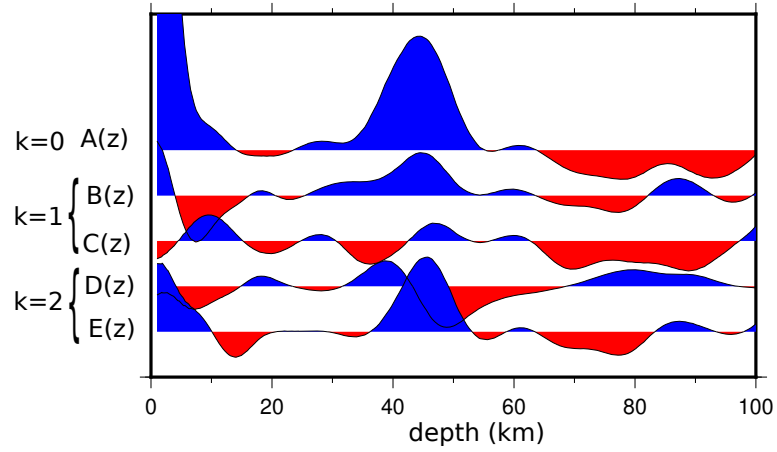

energy

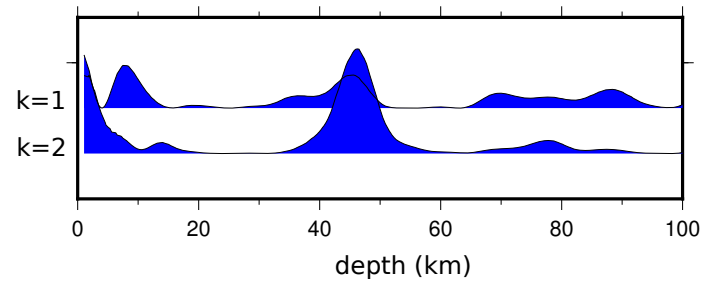

# NBPA

harmonics

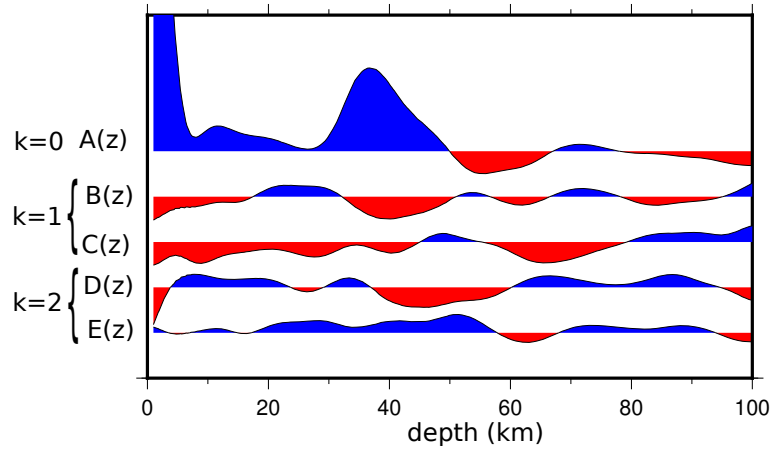

energy

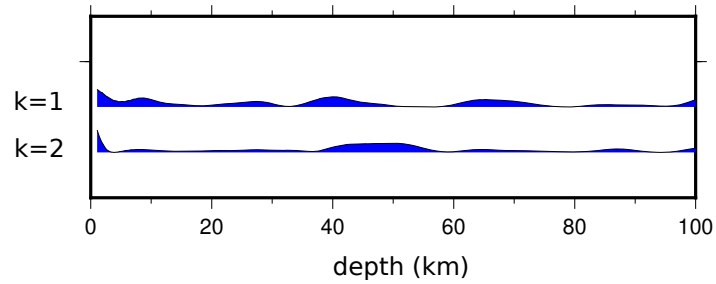

# NBPB

harmonics

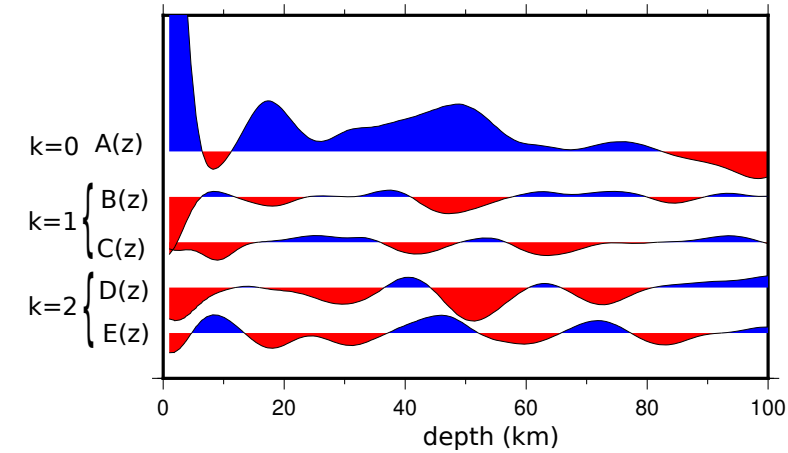

energy

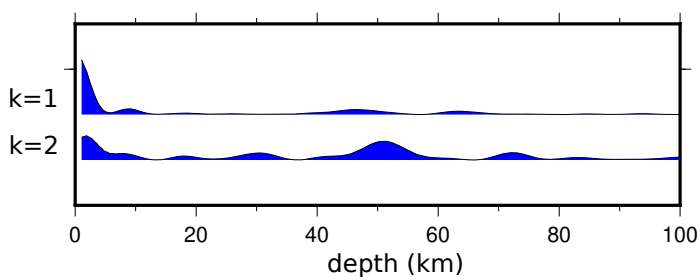

# NBPN

harmonics

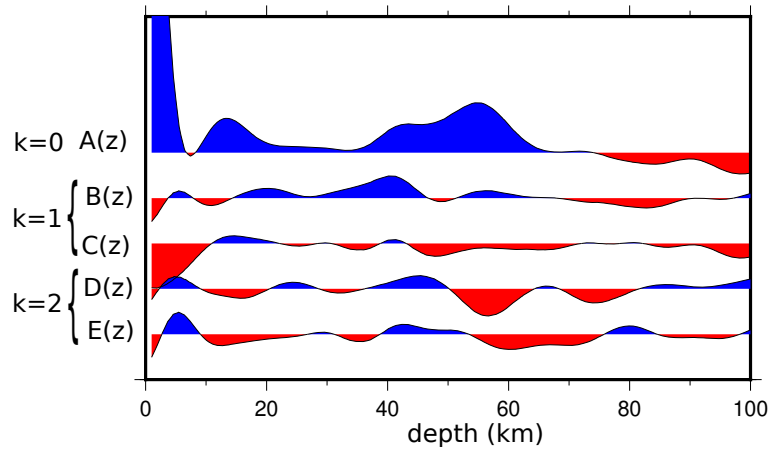

energy

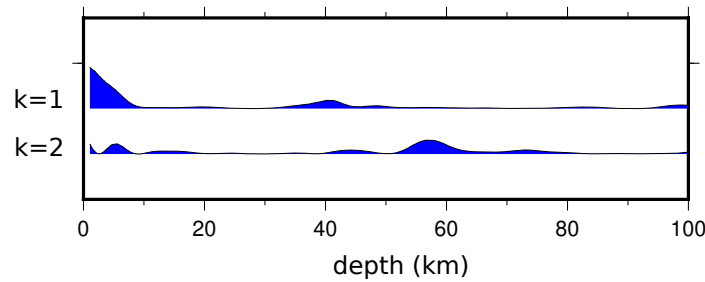

## NBPS

harmonics

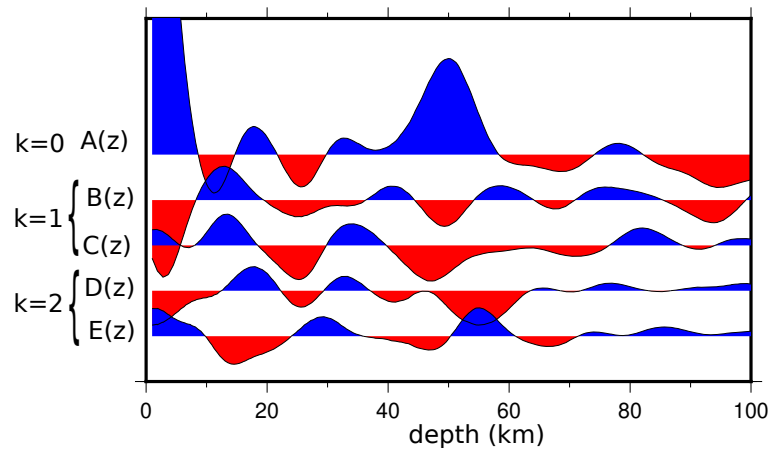

energy

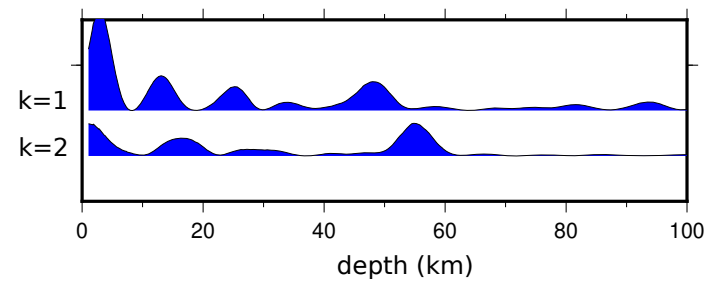

## NBRF

harmonics

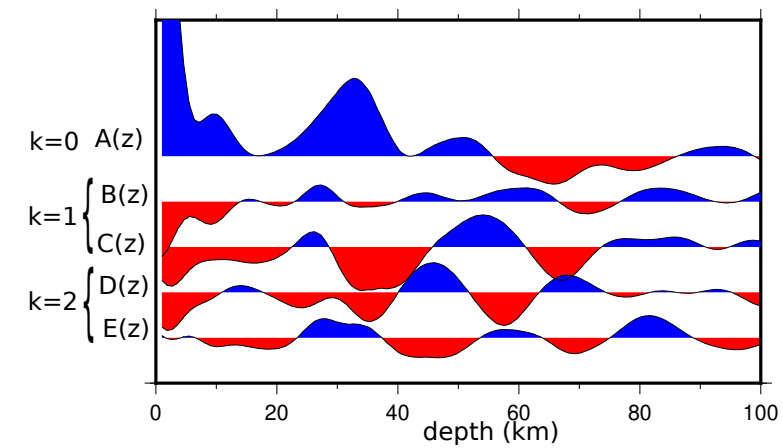

energy

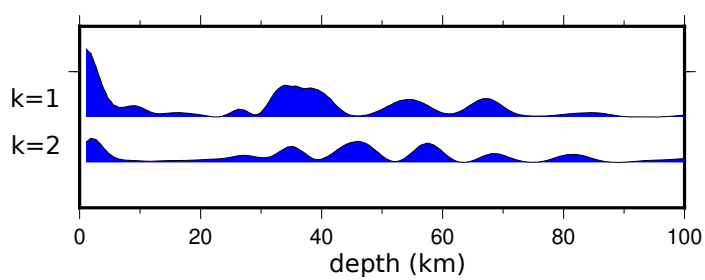

## NBPV

harmonics

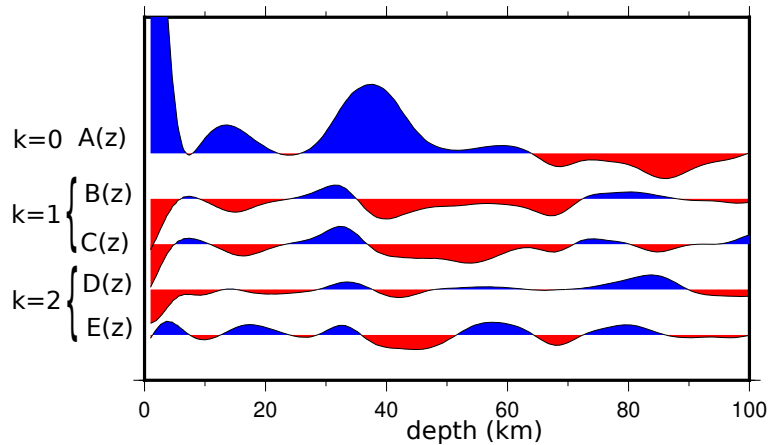

energy

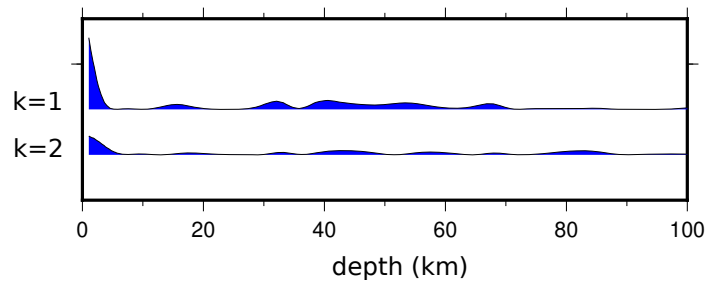

## NBTA

harmonics

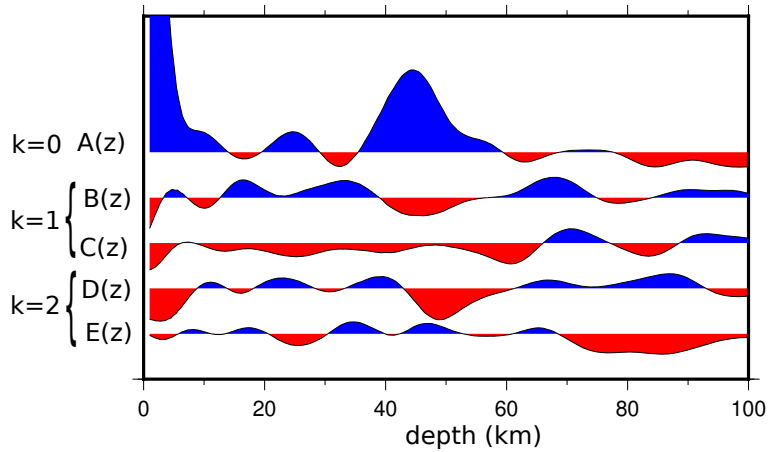

energy

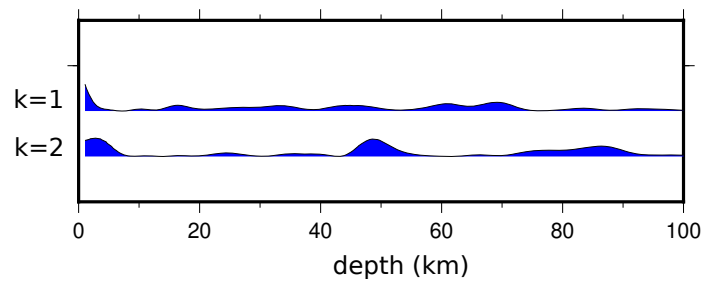

# OCBR

harmonics

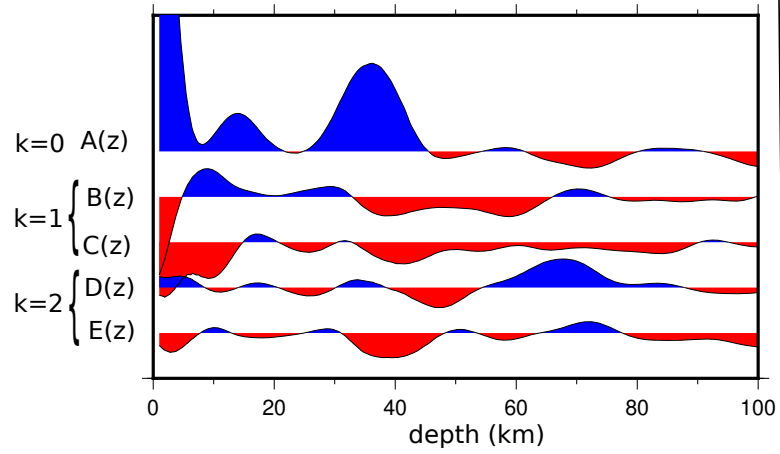

energy

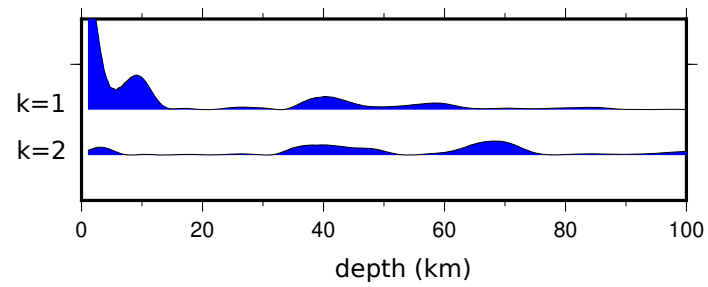

# PCJA

harmonics

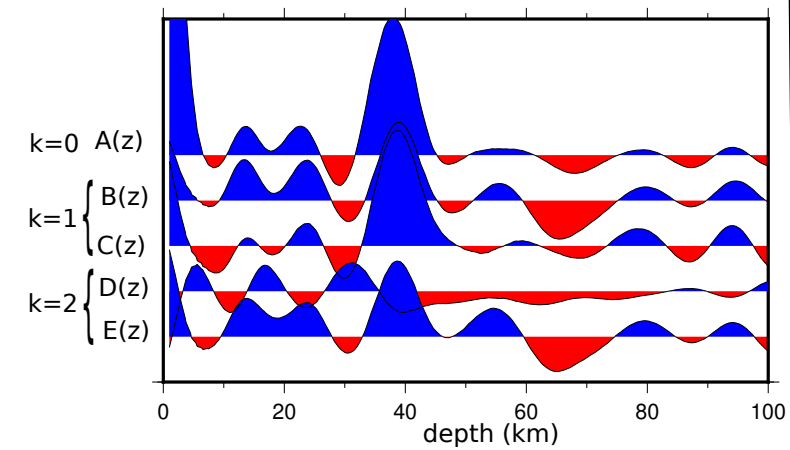

energy

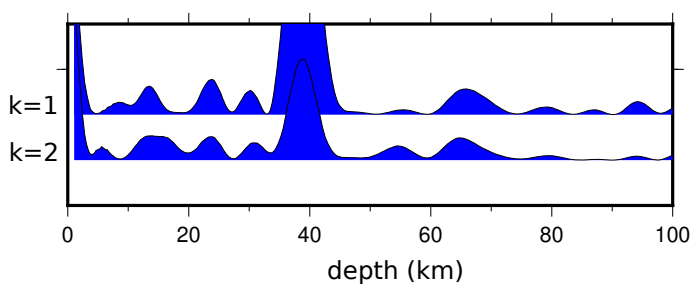

# PCAL

harmonics

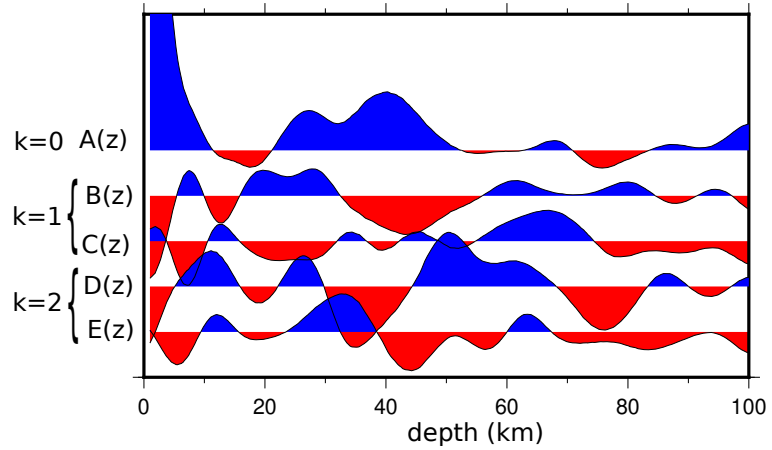

energy

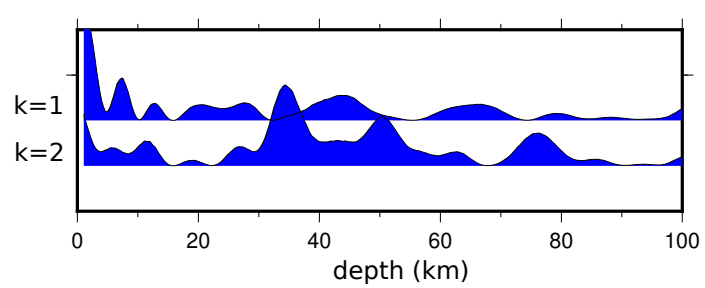

# PCSA

harmonics

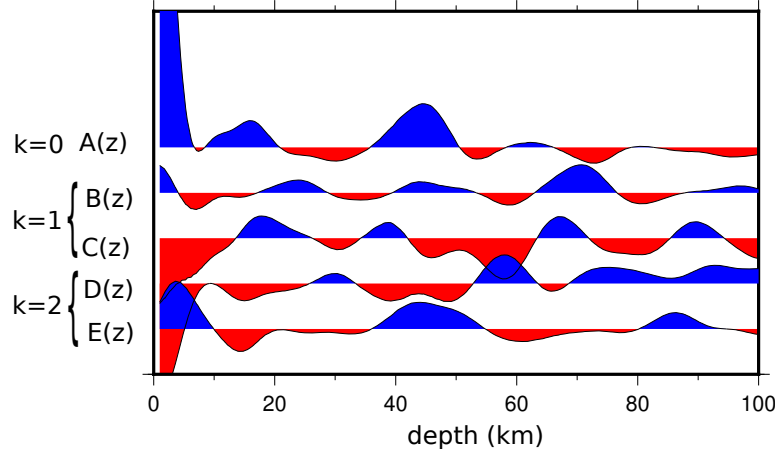

energy

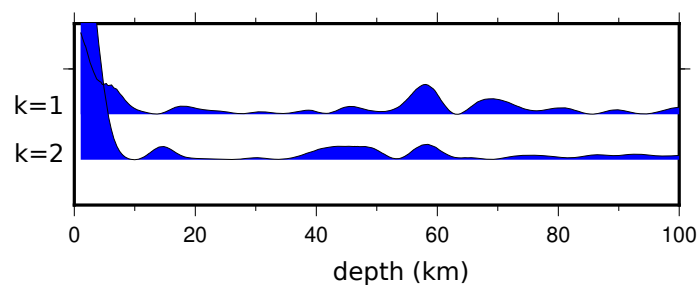

## PCSE

harmonics

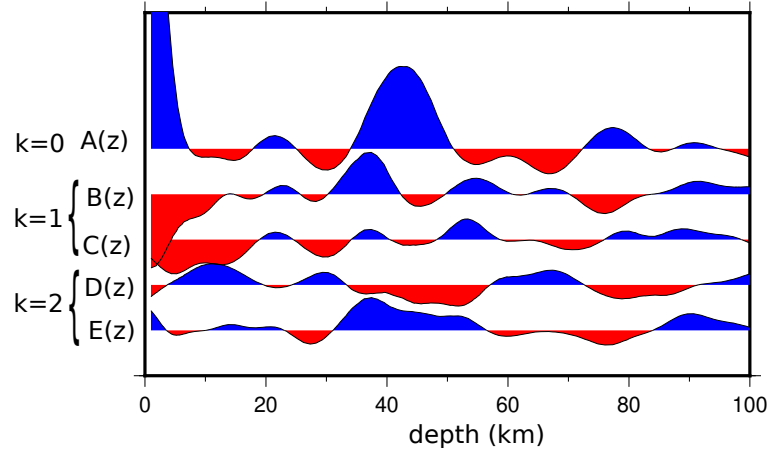

energy

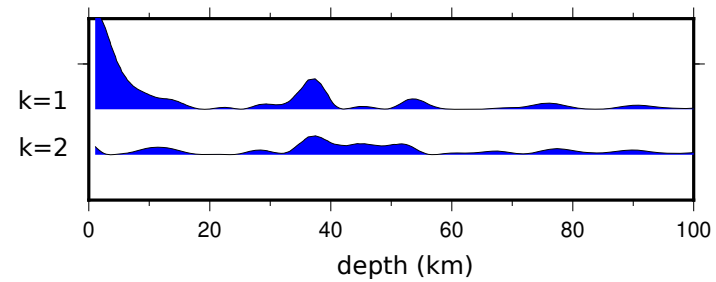

## PCTV

harmonics

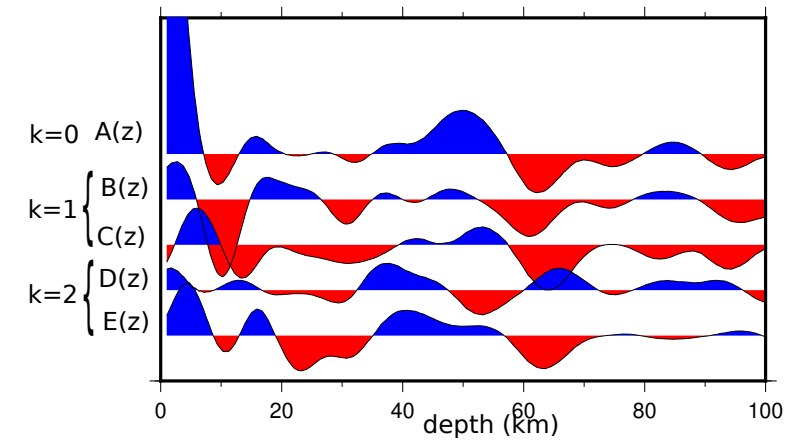

energy

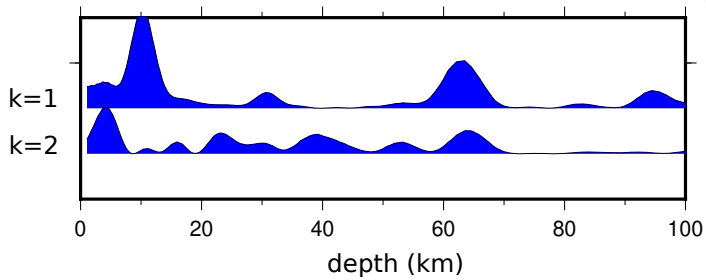

## PCSL

harmonics

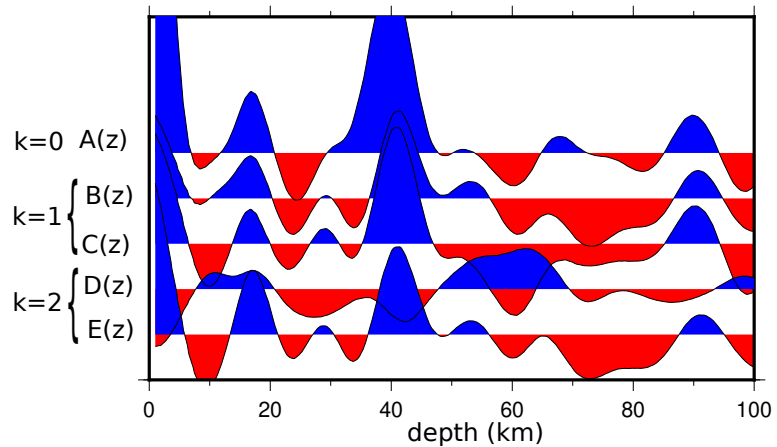

energy

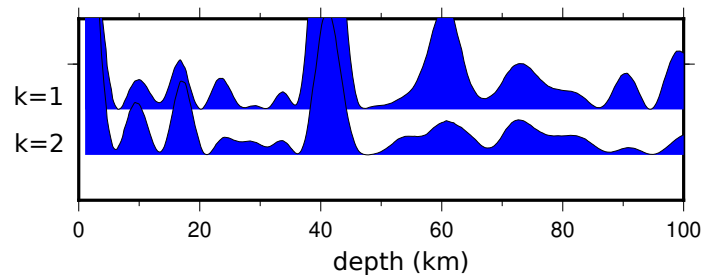

## PDCB

harmonics

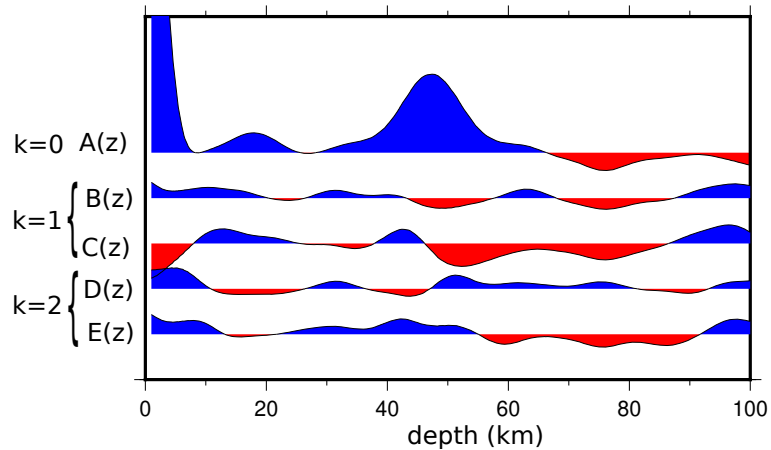

energy

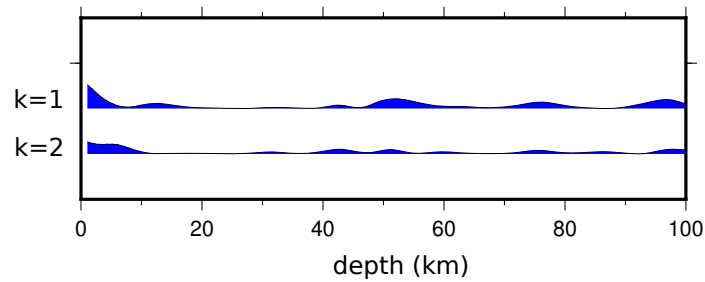

## PFBR

harmonics

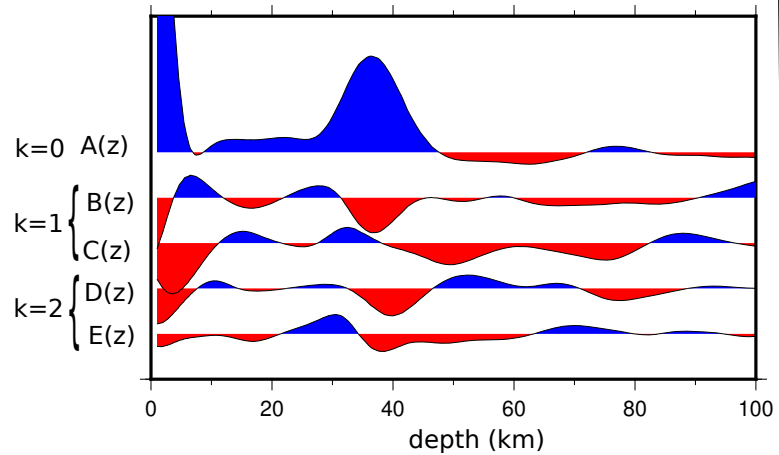

energy

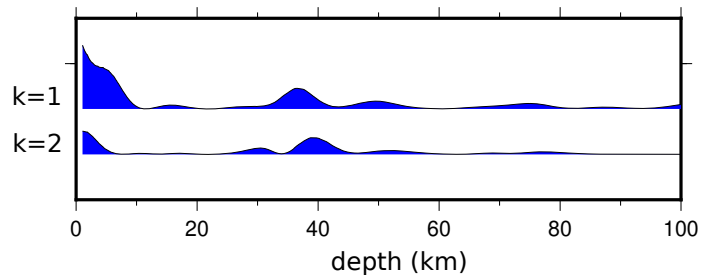

## SABR

harmonics

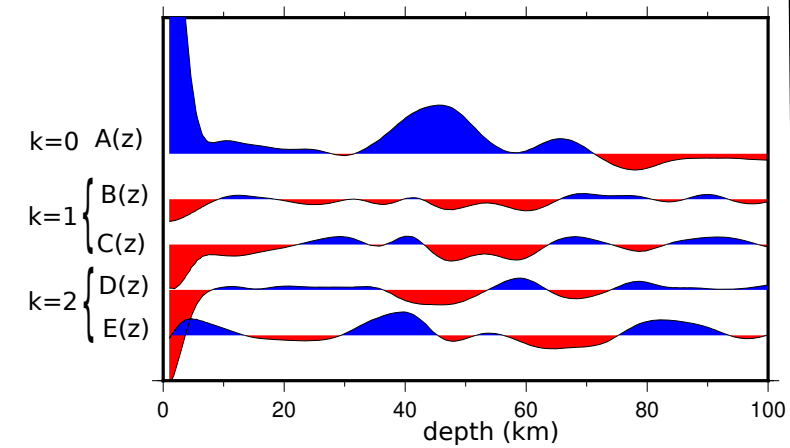

energy

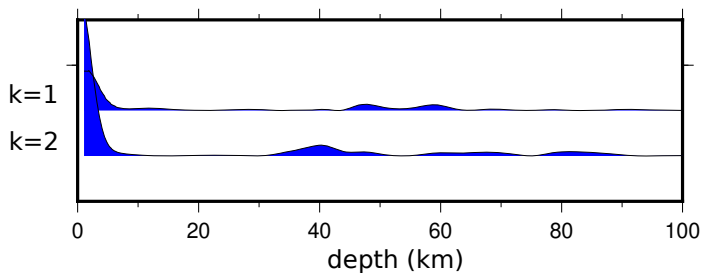

## RCBR

harmonics

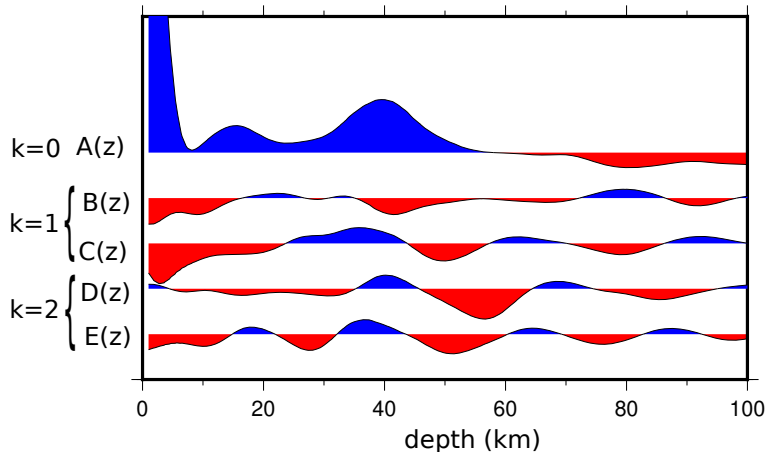

energy

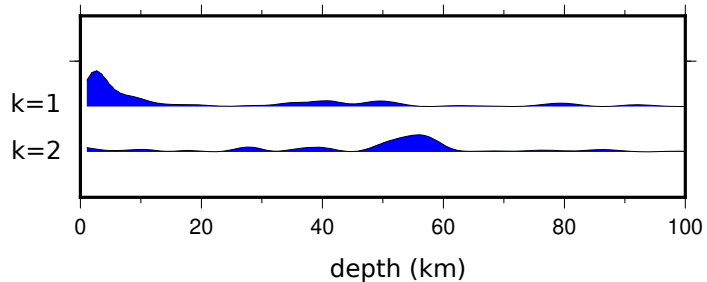

## SBBR

harmonics

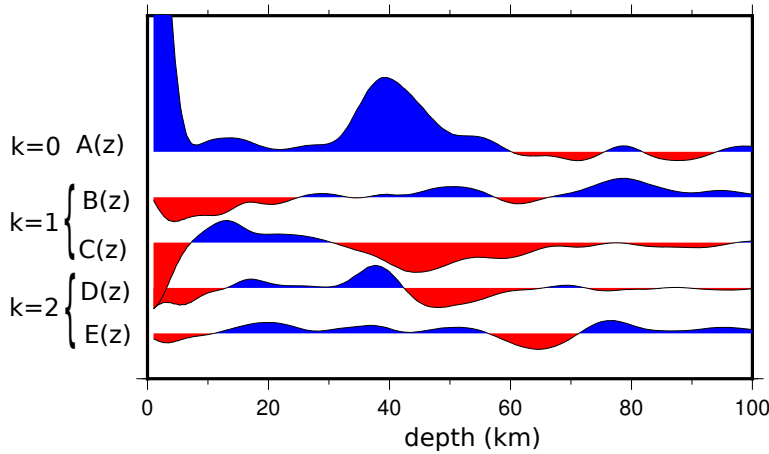

energy

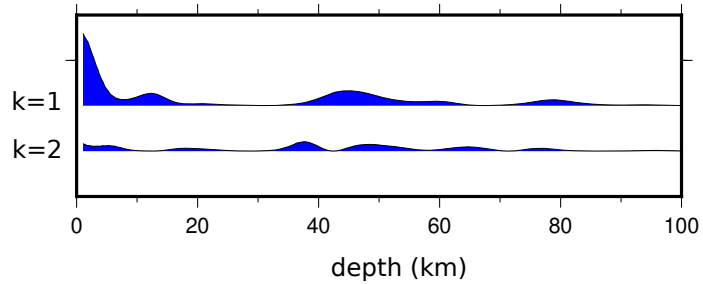

# TRSB

## harmonics

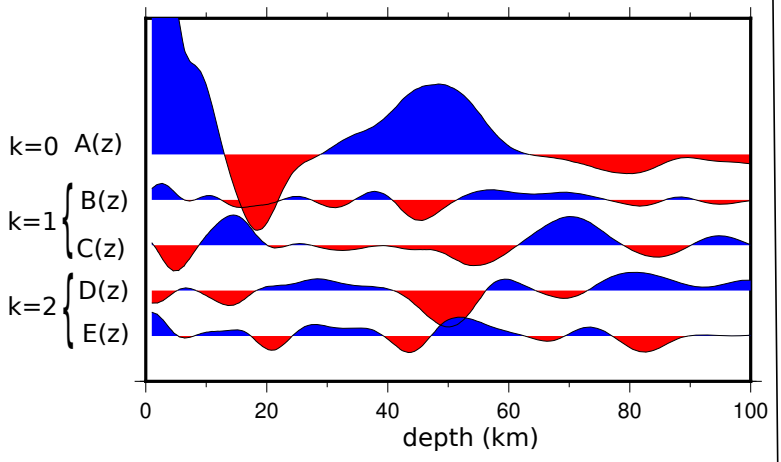

## energy

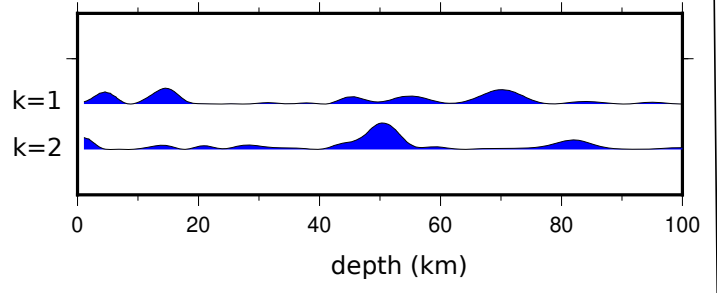

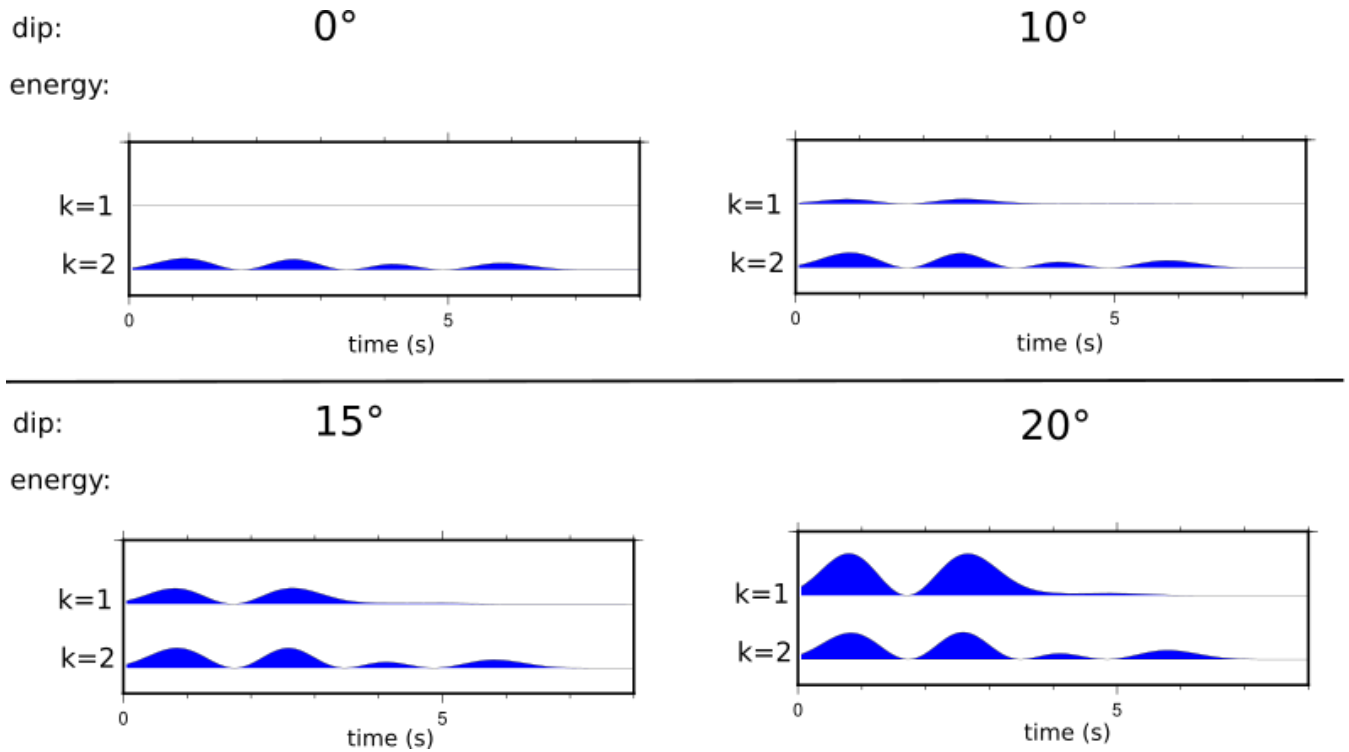

**Figure S2.** Energy on k=1 and k=2 harmonics are calculated for synthetics within a velocity model with 3 layers and constant  $V_p$  and  $V_s$ . The first and third layers are isotropic whereas the second layer display 6% anisotropy for both P and S-waves with fast axis dipping indicated above each corresponding graph (0, 10, 15 and 20°).
